# Supplementary material for: Differential, Stage Dependent Detection of Peptidylarginine Deiminases and Protein Deimination in Lewy Body Diseases—Findings from a Pilot Study
Source: Int J Mol Sci. 2022 Oct 28;23(21):13117. doi: 10.3390/ijms232113117 (PMC9658624; doi:10.3390/ijms232113117)
Supplement: Supplementary file 1 [file ijms-23-13117-s001.zip › ijms-1984739 - supplementary.pdf]

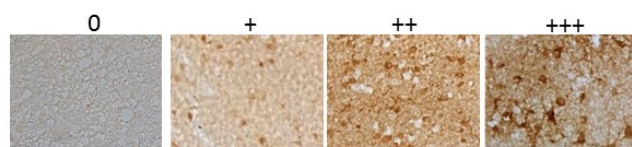

**Figure S1.** An indicator key for staining intensity scoring for immunohistochemical detection of PAD isozymes in protein deimination in brain sections used in this pilot study. Scoring intensity is as follows: 0 (negligible positive staining), + (low positive staining), ++ (medium positive staining intensity), +++ (strong positive staining).

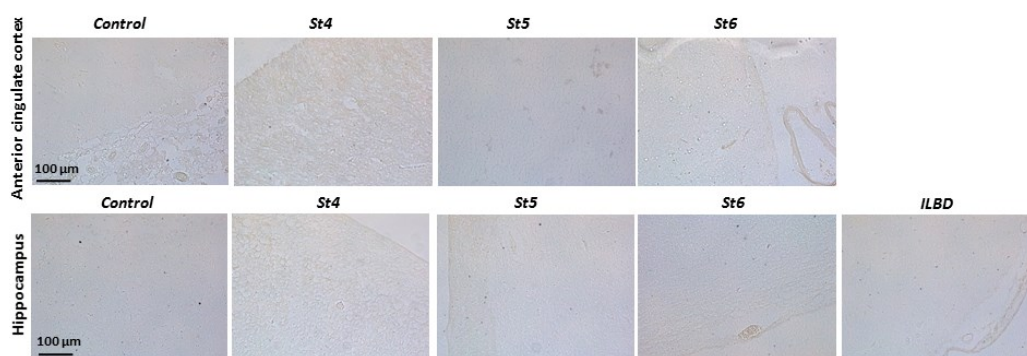

**Figure S2.** Negative control staining, omitting the primary antibody. Anterior cingulate cortex from control tissue alongside PD Braak stages 4, 5 and 6. Hippocampus from control tissue, from PD Braak stages 4, 5 and 6, and from incidental Lewy Body disease (ILBD). Scale bar shown (100 μm) is representative for all images.
